# Supplementary material for: Chemical modification of selenium-containing amino acids caused by non-thermal dielectric-barrier discharge atmospheric-pressure plasma
Source: Royal Society of Chemistry journal article supplement (doi:10.1039/d4ra05754f), 2024-01-01
Supplement: d4ra05754f1.pdf [file d4ra05754f1.pdf]

## Electronic Supporting Information

for

# CHEMICAL MODIFICATION OF SELENIUM-CONTAINING AMINO ACIDS CAUSED BY NON-THERMAL DIELECTRIC-BARRIER DISCHARGE ATMOSPHERIC-PRESSURE PLASMA

by

Fahd Afzal<sup>a</sup>, Dariusz Śmiłowicz<sup>b</sup>, Friederike Kogelheide<sup>c</sup>, Anna Lena Schöne<sup>c</sup>, Katharina Stapelmann<sup>d</sup>, Peter Awakowicz<sup>c</sup>, Nils Metzler-Nolte<sup>\*,a</sup>

<sup>a</sup> Inorganic Chemistry I – Bioinorganic Chemistry, Faculty of Chemistry and Biochemistry, Ruhr-University Bochum, Bochum, Germany

<sup>b</sup> Department of Chemistry, University of Wisconsin-Madison, Madison, Wisconsin 53706, United States

<sup>c</sup> Institute for Electrical Engineering and Plasma Technology, Ruhr University Bochum, 44780, Bochum, Germany

<sup>d</sup> Department of Nuclear Engineering, North Carolina State University, Raleigh, North Carolina 27695, United States

## Contents

|                                                                        |           |
|------------------------------------------------------------------------|-----------|
| 1. The scheme of the plasma source                                     | p.S2      |
| 2. Characterisation of zinc(II) complex                                | p.S2-S4   |
| 3. Influence of plasma on zinc(II) complex                             | p.S4-S6   |
| 4. Stability experiments of substrates                                 | p.S7-S8   |
| 5. Influence of plasma on substrates in the presence of iron complexes | p.S8-S9   |
| 6. Influence of plasma on GSSG in the presence of zinc complex         | p.S10-S12 |
| 7. FT-IR data of substrates after cold plasma treatment                | p.S13-S15 |
| 8. Literature                                                          | p.S16     |

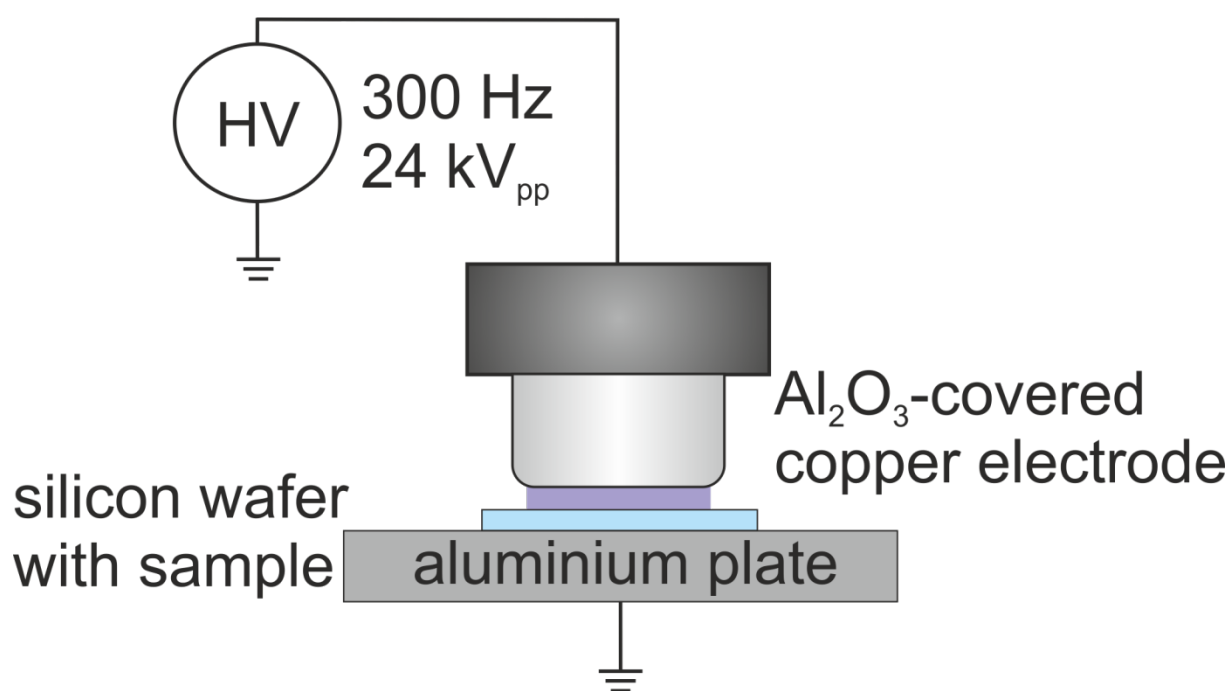

**Figure S1.** The scheme of the plasma source.<sup>1,2,3</sup>

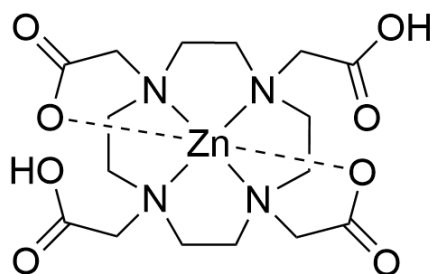

Exact Mass: 466.10  
Molecular Weight: 467.78

**Figure S2.** Structure of complex C.

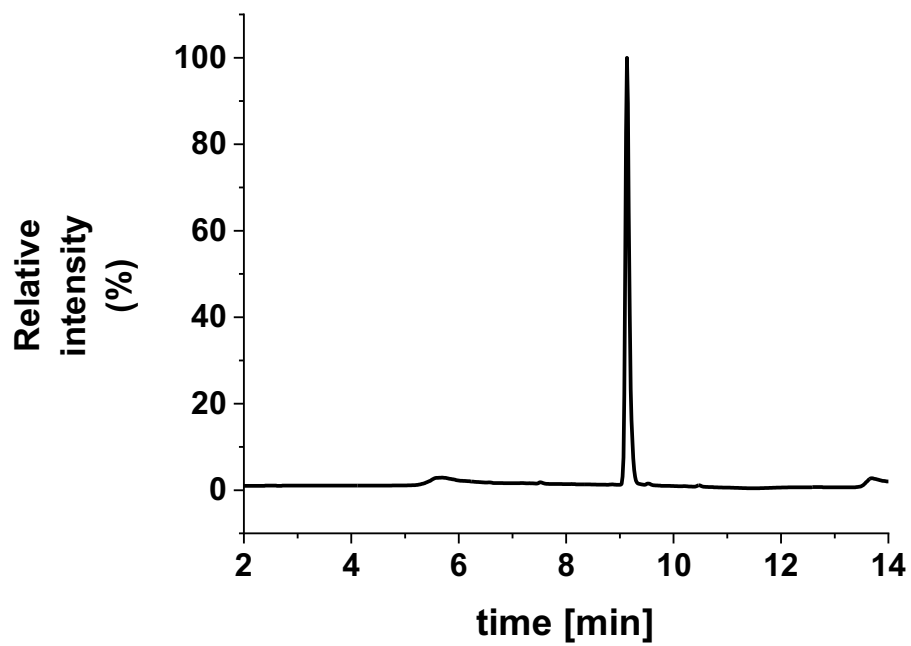

Figure S3. HPLC chromatogram of complex C.

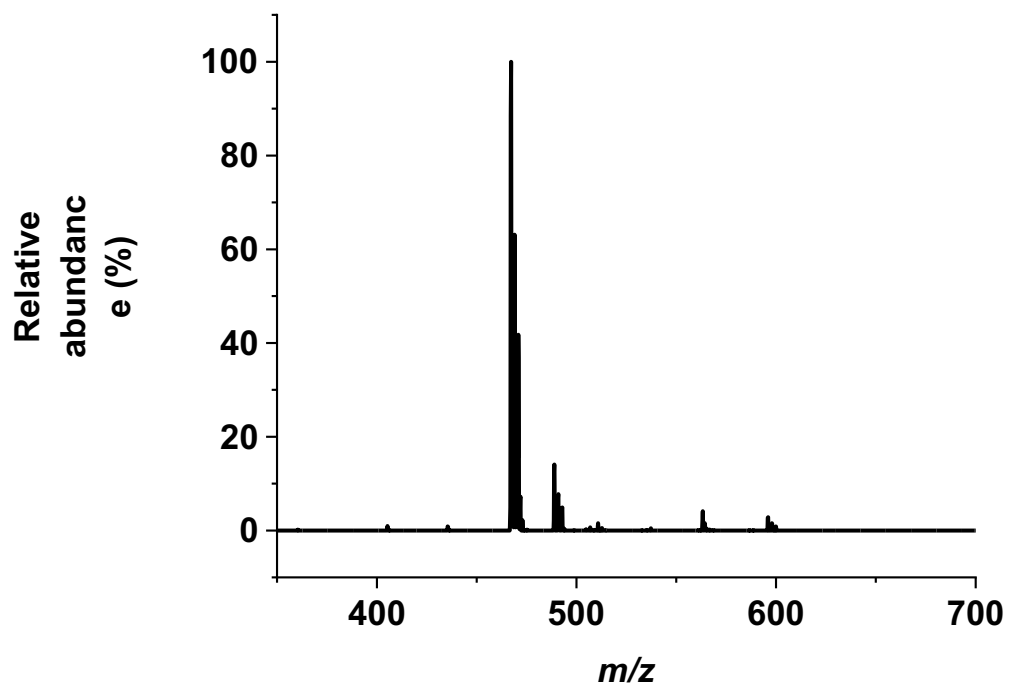

Figure S4. ESI-MS spectrum (positive mode) of complex C.

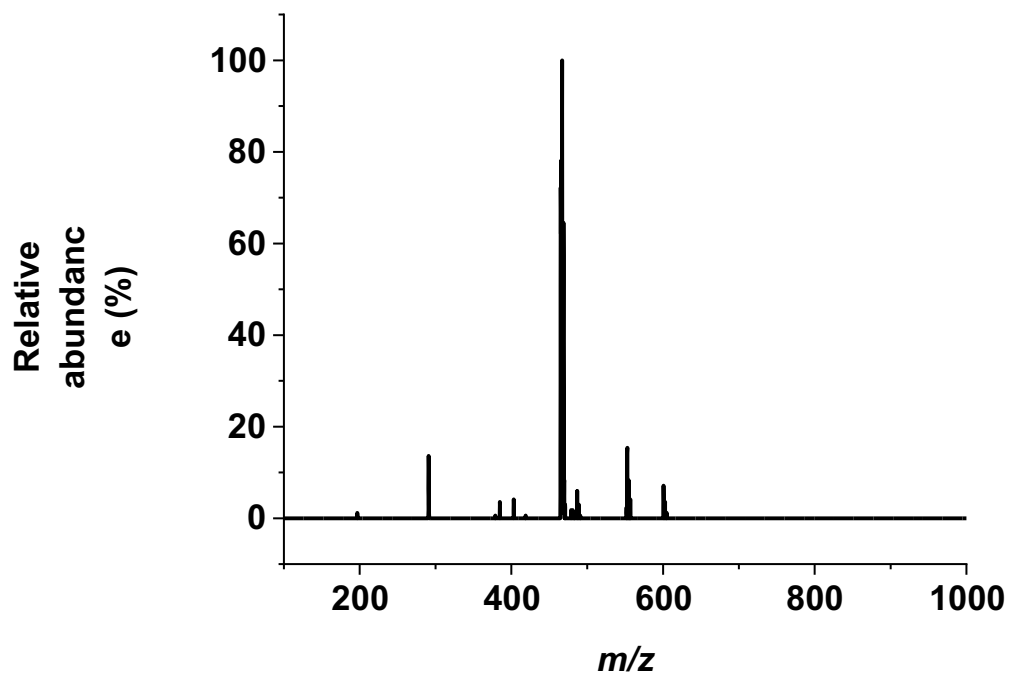

Figure S5. ESI-MS spectrum (negative mode) of complex C.

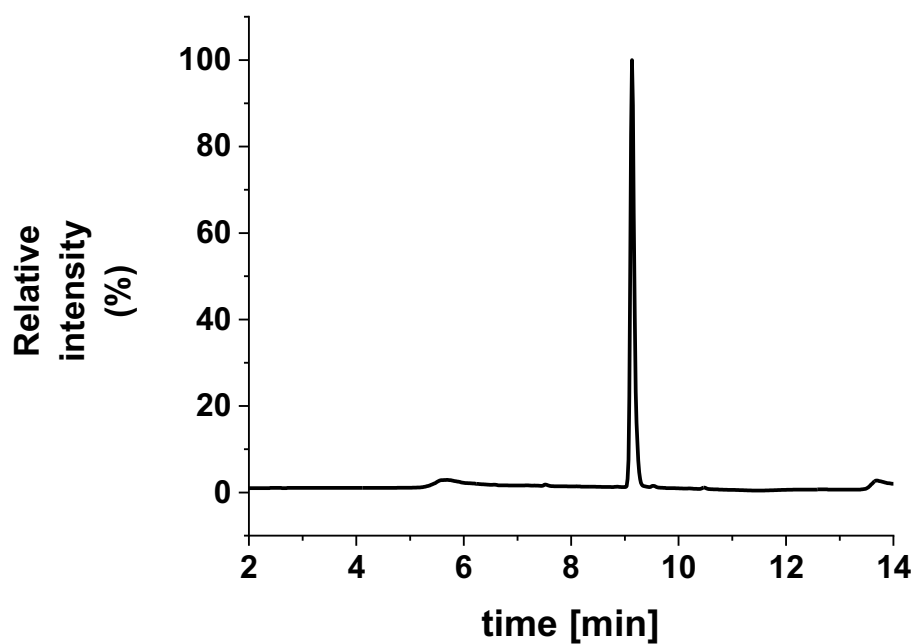

Figure S6. HPLC chromatogram of complex C after 2 min of cold plasma treatment.

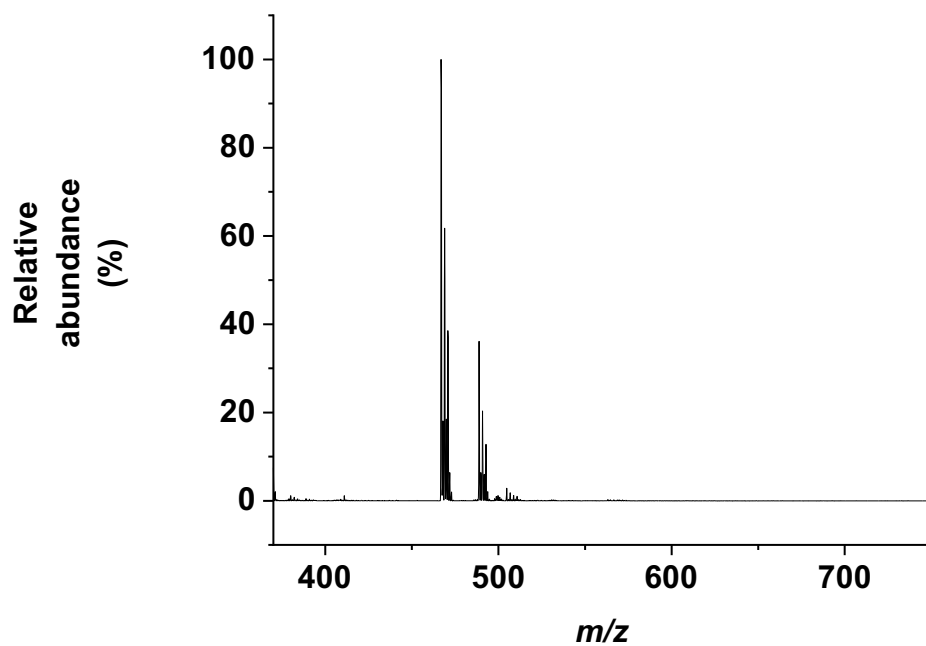

**Figure S7.** ESI-MS spectrum (positive mode) of complex **C** after 2 min of cold plasma treatment

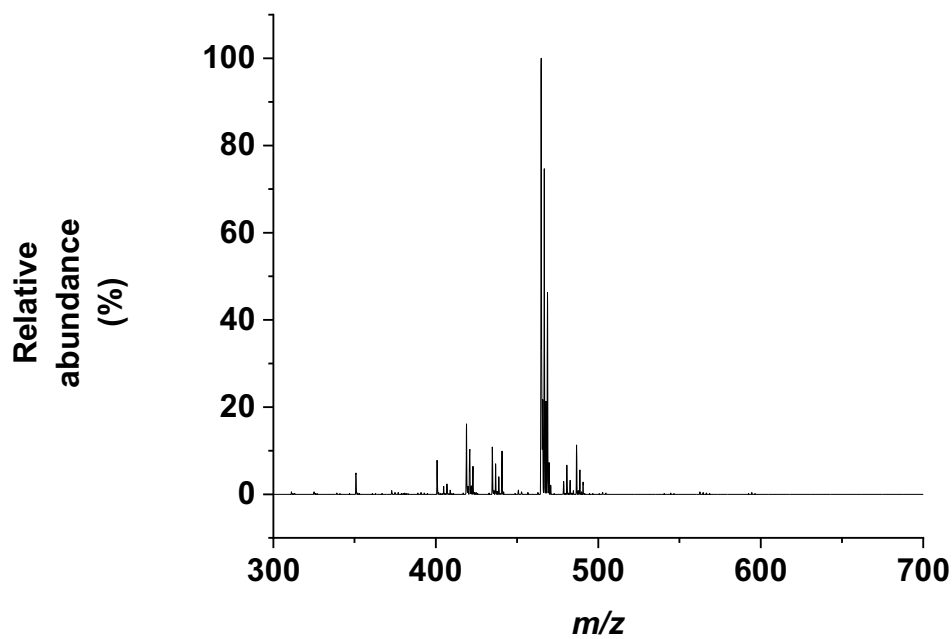

**Figure S8.** ESI-MS spectrum (negative mode) of complex **C** after 2 min of cold plasma treatment.

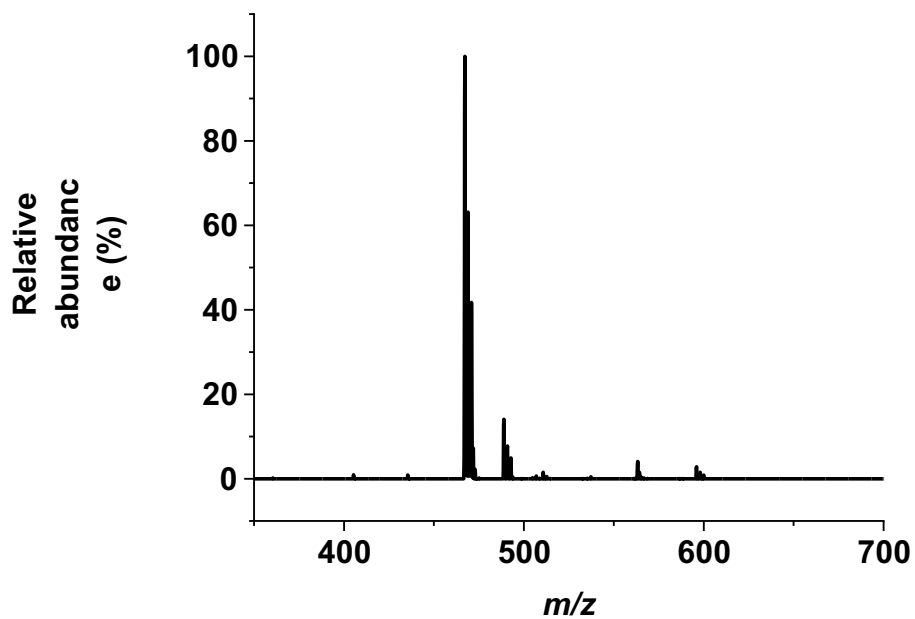

**Figure S9.** ESI-MS spectrum (positive mode) of complex **C** after 20 min of cold plasma treatment.

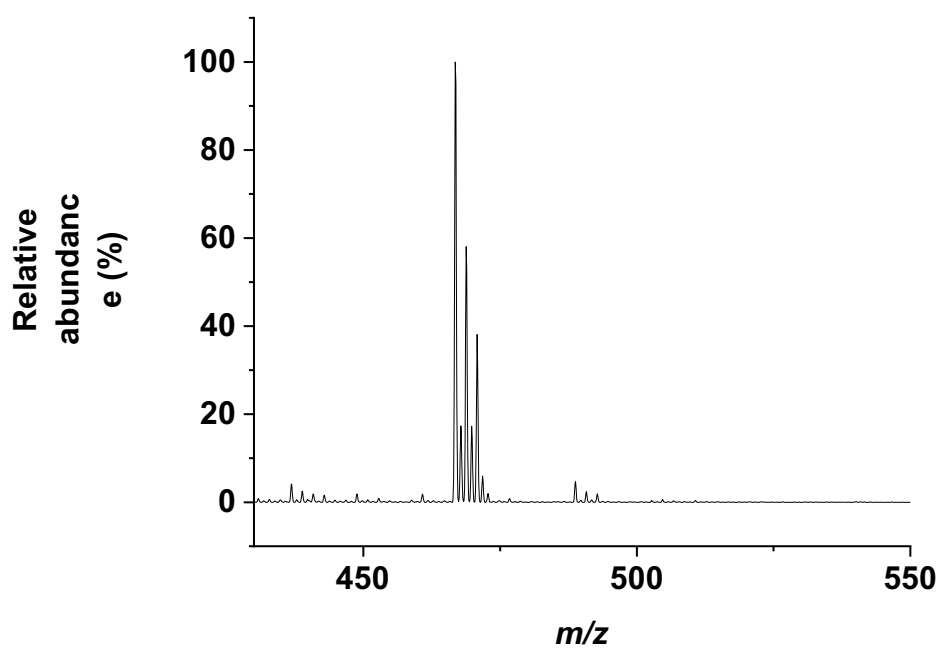

**Figure S10.** ESI-MS spectrum (negative mode) of complex **C** after 20 min of cold plasma treatment.

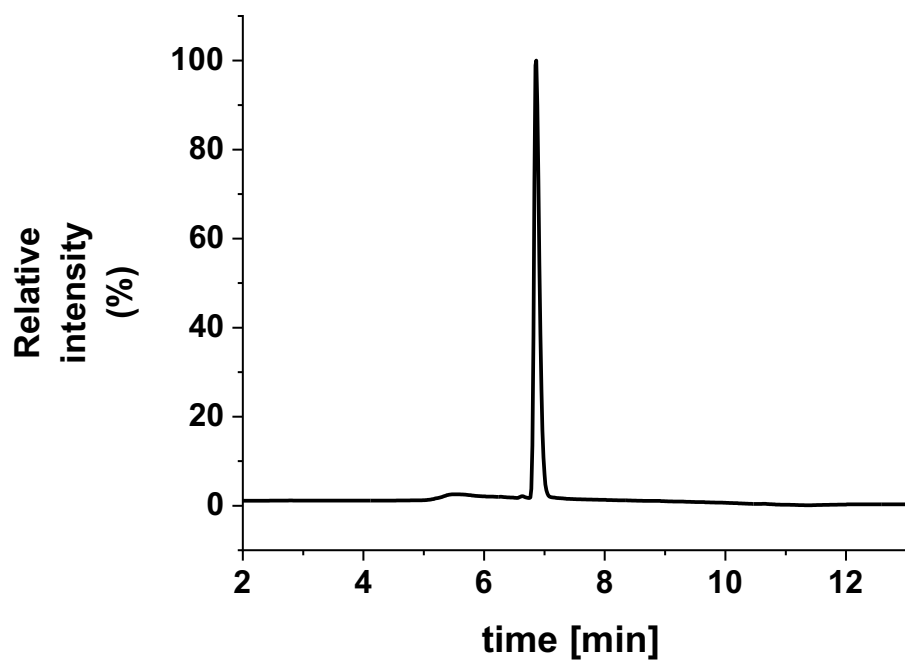

Figure S11. HPLC chromatogram of compound 1 after 5 min of stability experiments.

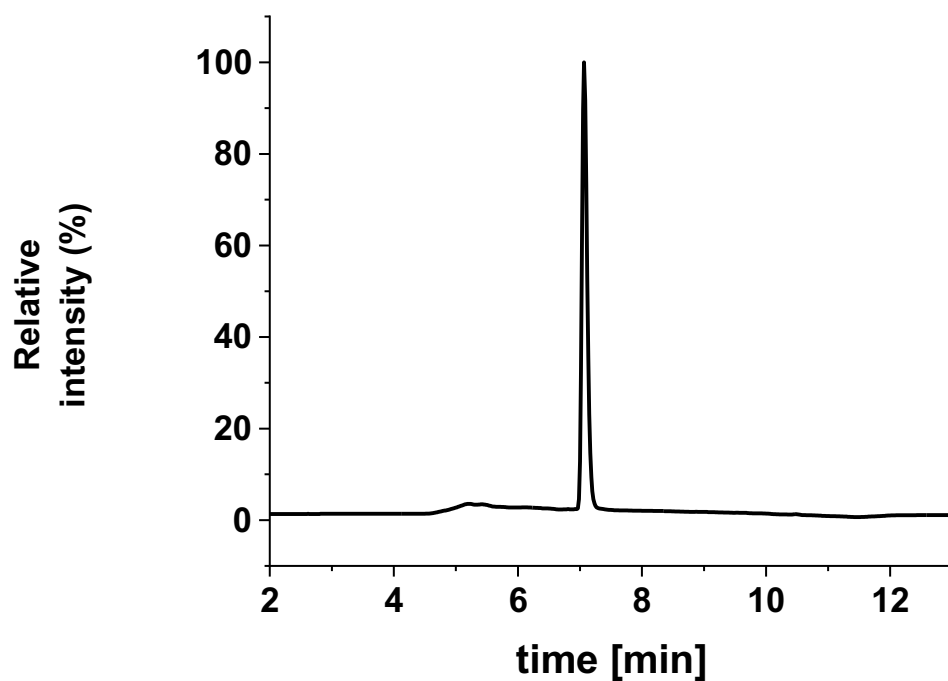

Figure S12. HPLC chromatogram of compound 2 after 5 min of stability experiments.

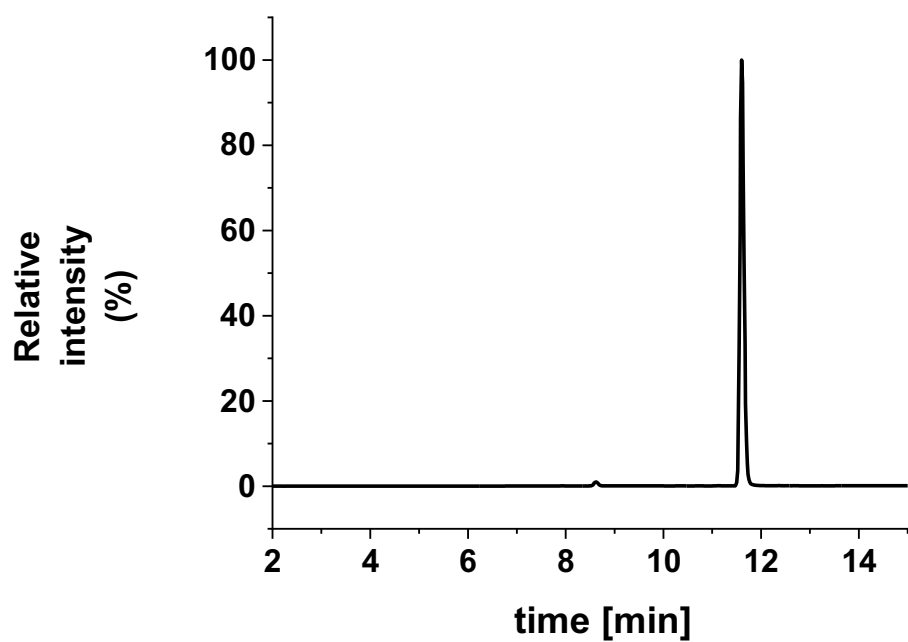

Figure S13. HPLC chromatogram of compound **3** after 5 min of stability experiments.

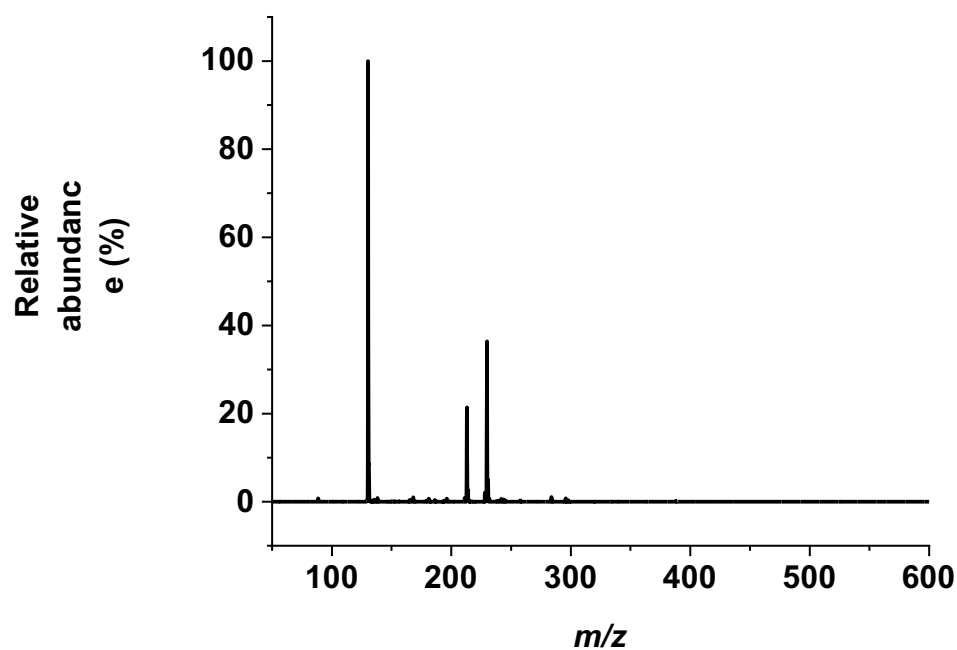

Figure S14. ESI-MS spectrum (negative mode) of compound **1** in the presence of iron(III) after 1 min of cold plasma treatment.



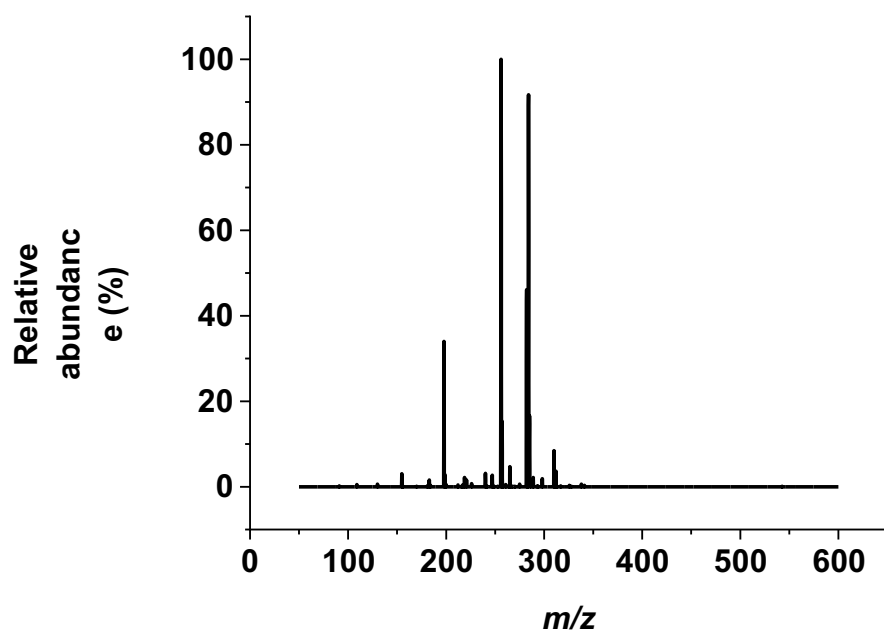

**Figure S15.** ESI-MS spectrum (negative mode) of compound **3** alone after 3 min of cold plasma treatment.

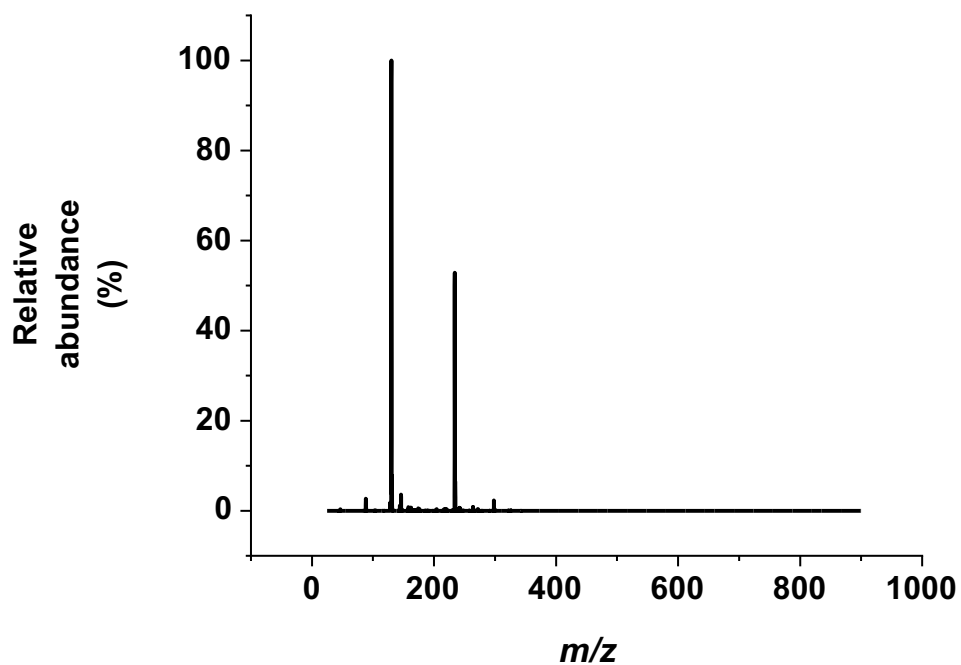

**Figure S16.** ESI-MS spectrum (negative mode) of compound **3** in the presence of iron(III) after 3 min of cold plasma treatment.

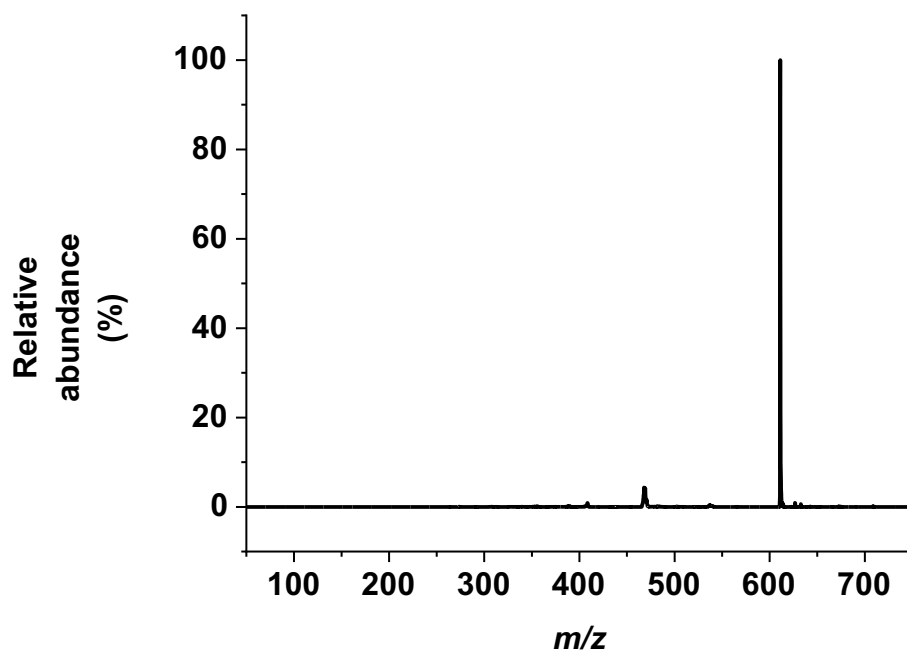

Figure S17. ESI-MS spectrum (negative mode) of GSSG.

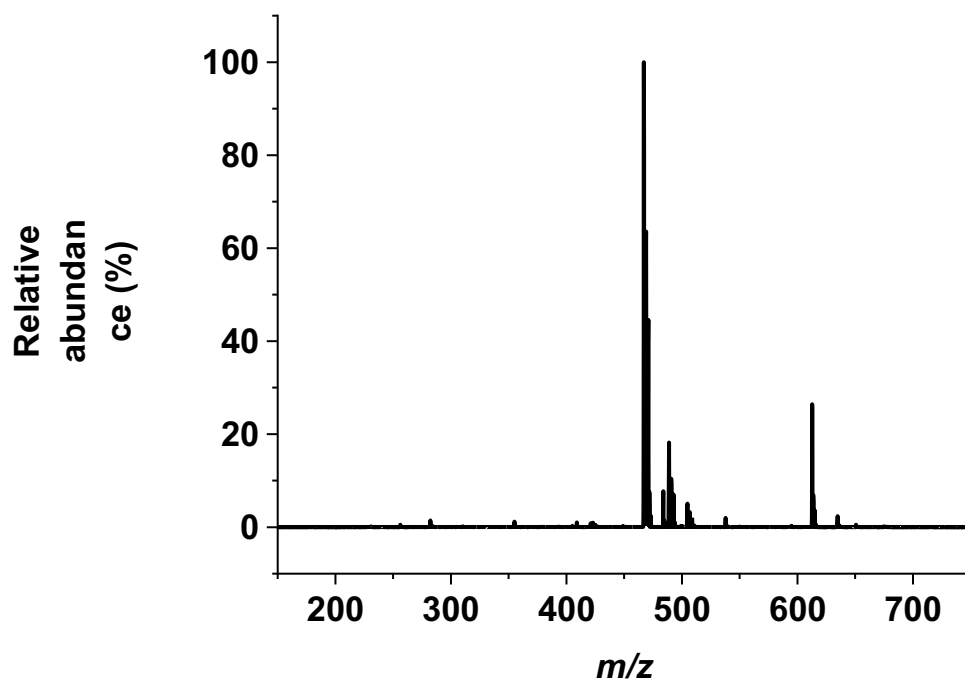

Figure S18. ESI-MS spectrum (positive mode) of GSSG in the presence of zinc(II) complex before cold plasma treatment.

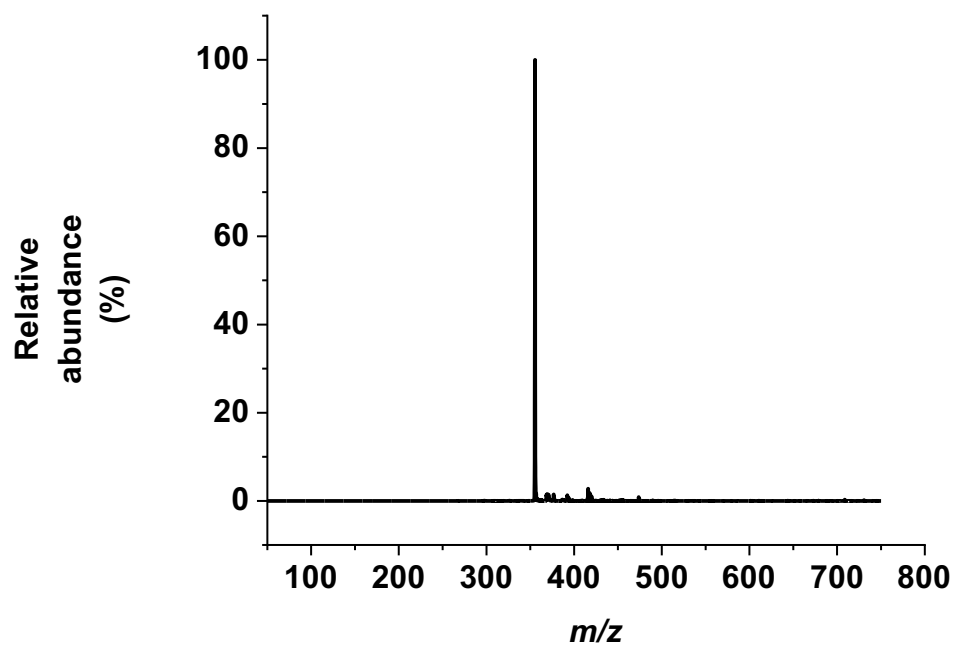

**Figure S19.** ESI-MS spectrum (negative mode) of GSSG in the presence of zinc(II) complex after 1 min of cold plasma treatment.

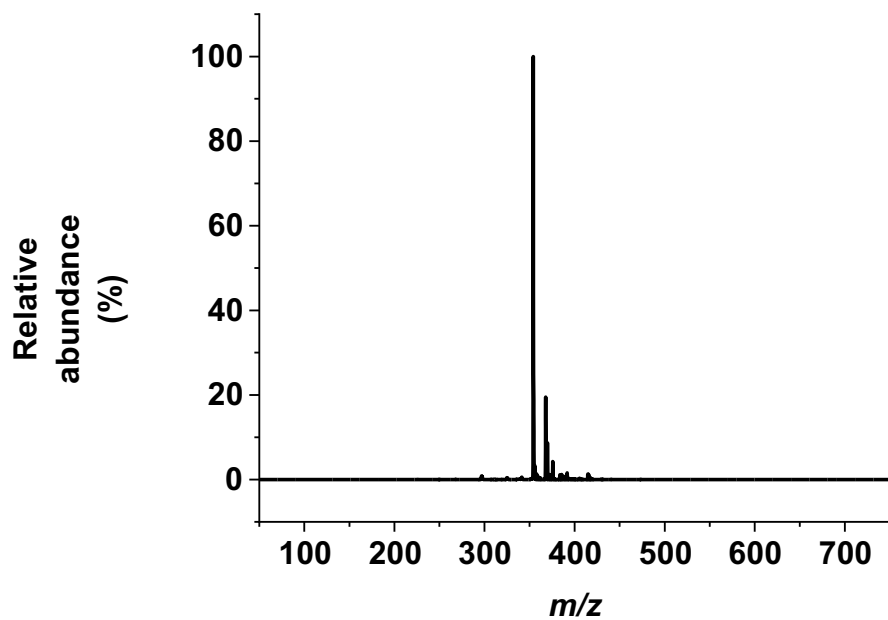

**Figure S20.** ESI-MS spectrum (negative mode) of GSSG in the presence of zinc(II) complex after 3 min of cold plasma treatment.

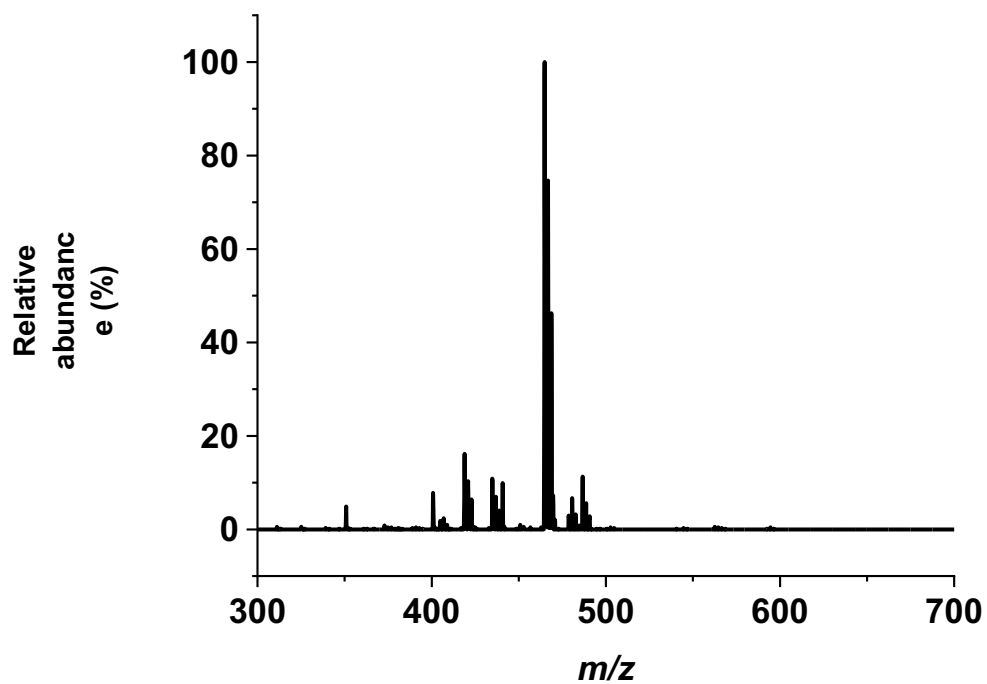

**Figure S21.** ESI-MS spectrum (negative mode) of GSSG in the presence of zinc(II) complex after 5 min of cold plasma treatment.

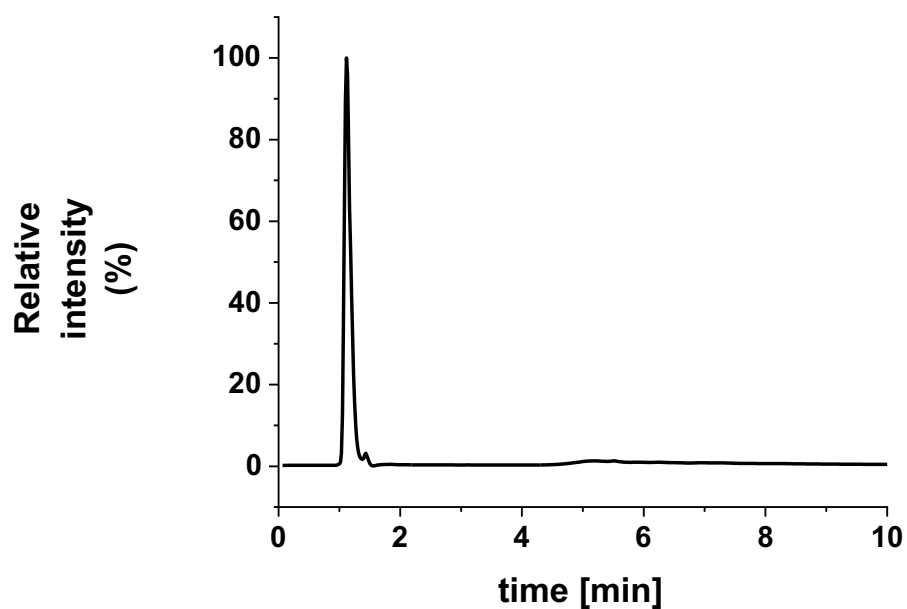

**Figure S22.** HPLC chromatogram of GSSG in the presence of zinc(II) complex after 5 min of cold plasma treatment.

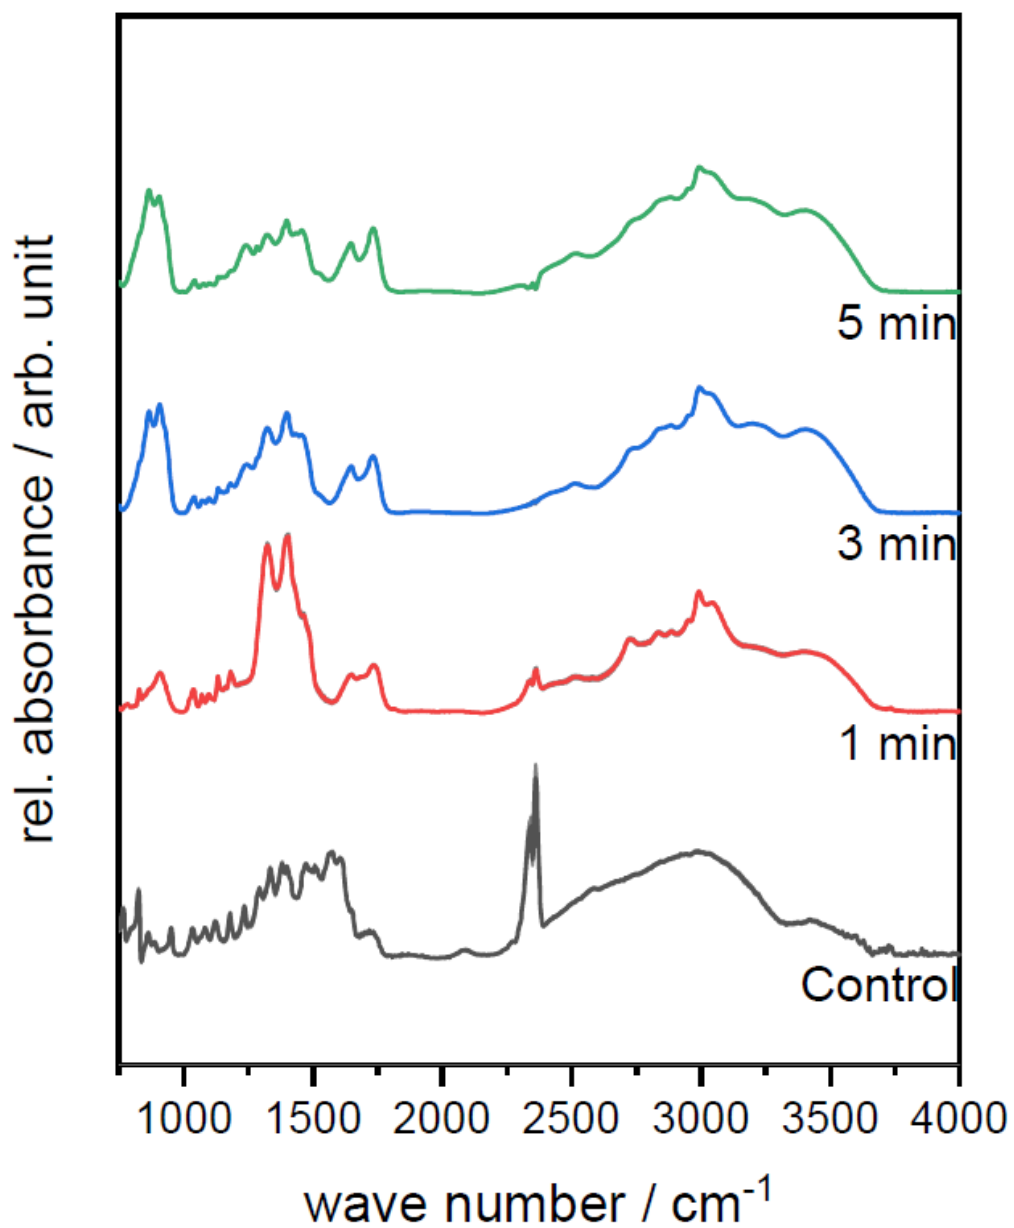

**Figure S23.** Mean FTIR-spectra of plasma-treated compound **3** in the range of 700-4000 cm<sup>-1</sup> as a function of different treatment times. Standard deviation of the mean is shown as grey area at each graph.

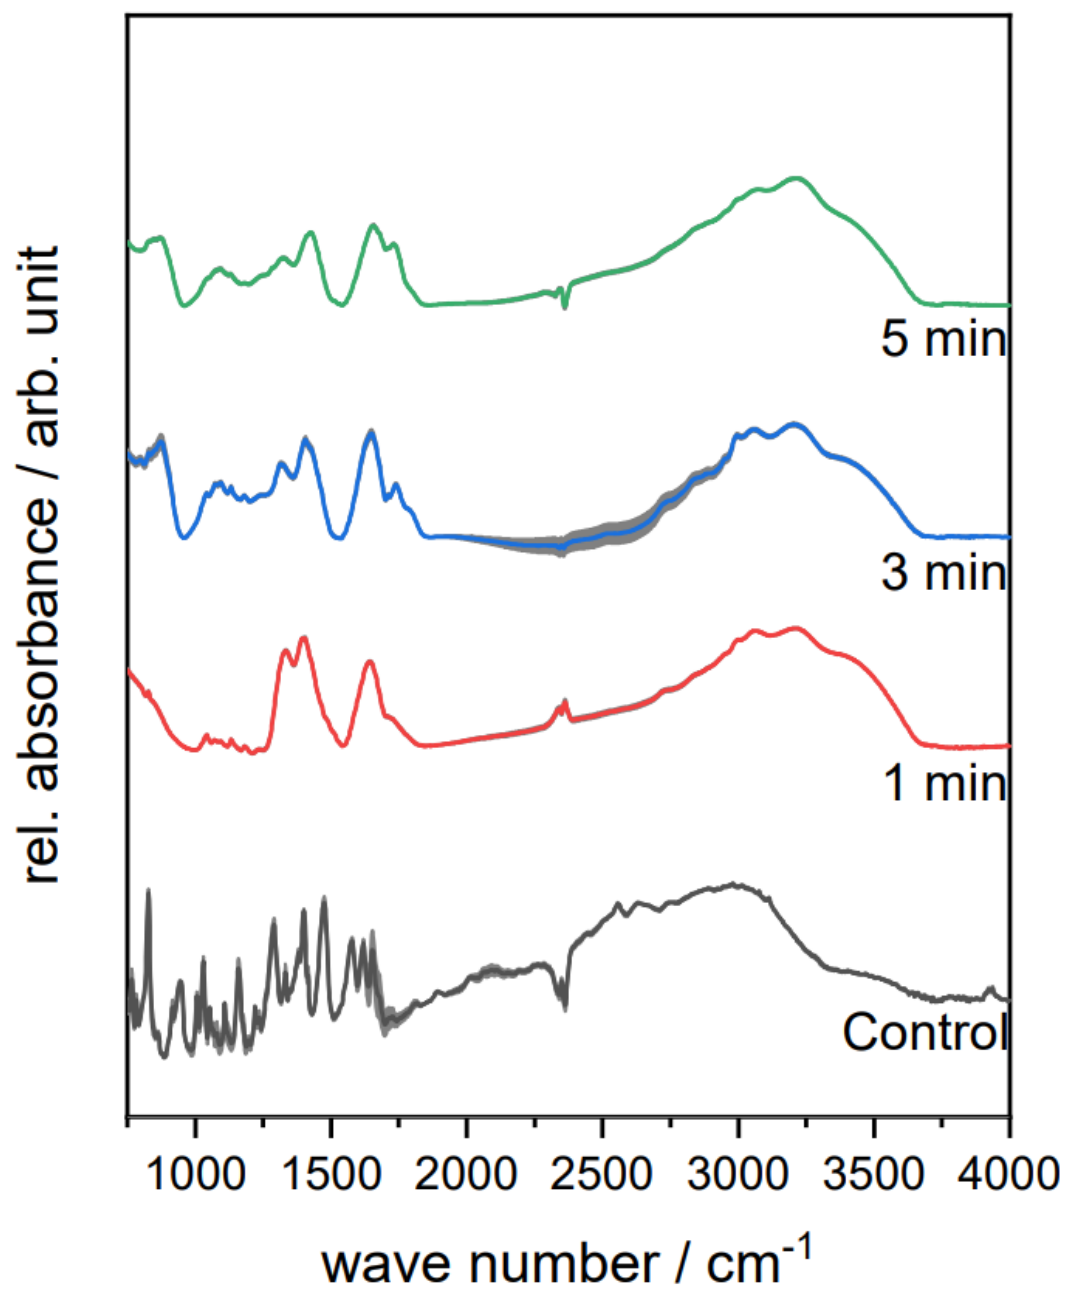

**Figure S24.** Mean FTIR-spectra of plasma-treated compound **3** in the presence of complex **A** in the range of 700-4000  $\text{cm}^{-1}$  as a function of different treatment times.

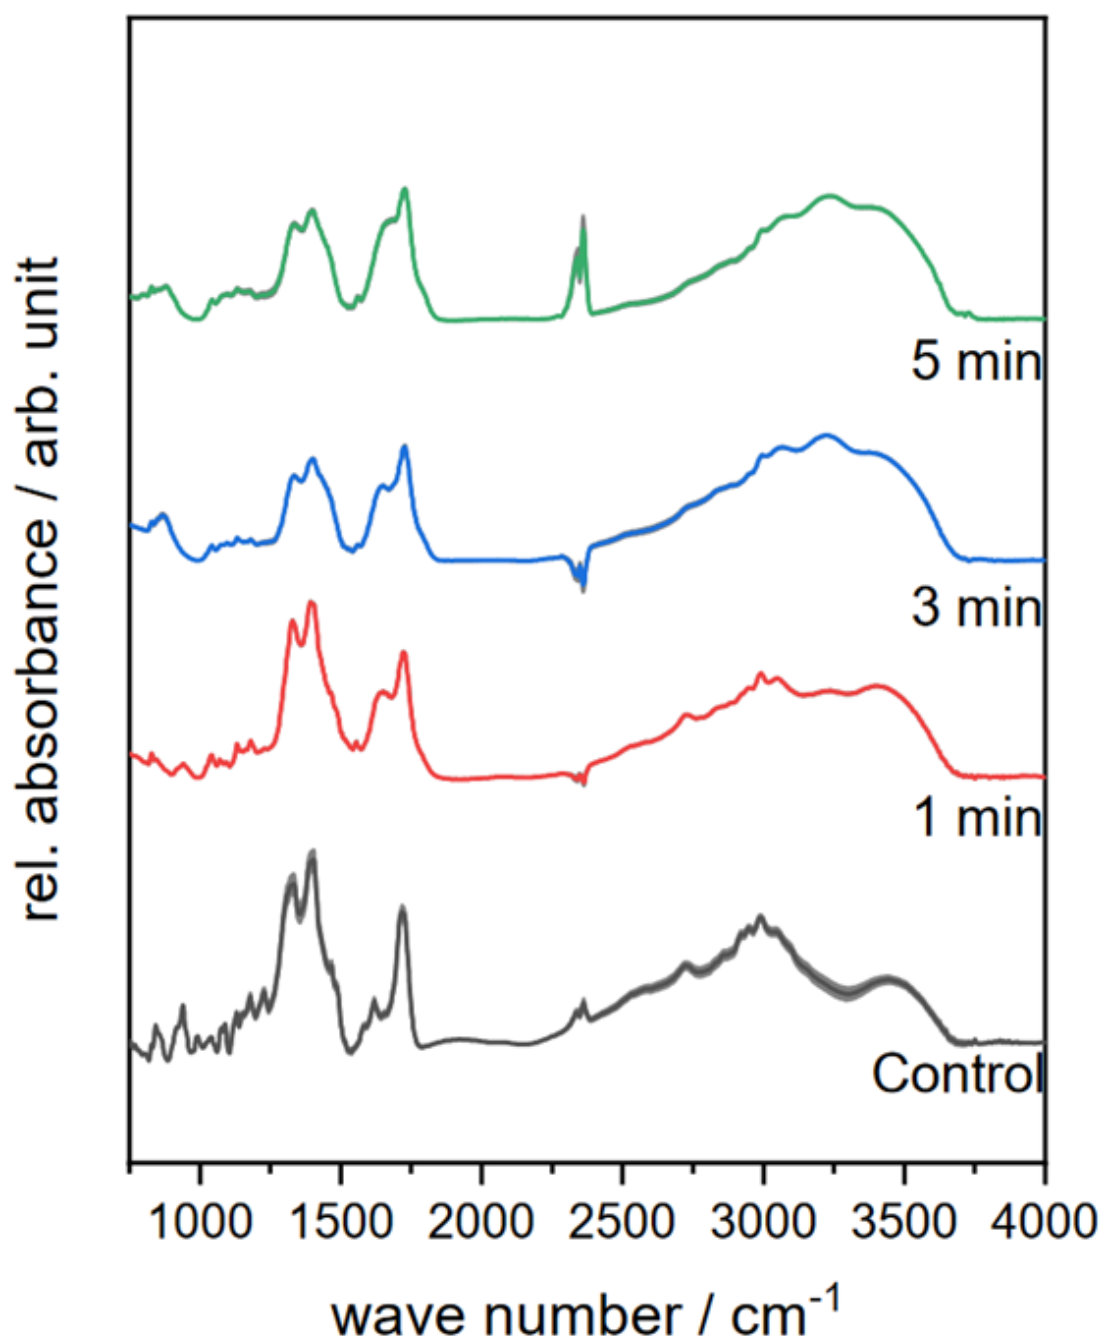

**Figure S25.** Mean FTIR-spectra of plasma-treated compound **3** in the presence of complex **B** in the range of 700-4000 cm<sup>-1</sup> as a function of different treatment times.

## References

1. Kogelheide, F.; Kartaschew, K.; Strack, M.; Baldus, S.; Metzler-Nolte, N.; Havenith, M.; Awakowicz, P.; Stapelmann, K.; Lackmann, J.-W., FTIR spectroscopy of cysteine as a ready-to-use method for the investigation of plasma-induced chemical modifications of macromolecules. *Journal of Physics D: Applied Physics* **2016**, *49* (8), 084004.
2. Kogelheide, F.; Offerhaus, B.; Bibinov, N.; Krajinski, P.; Schücke, L.; Schulze, J.; Stapelmann, K.; Awakowicz, P., Characterisation of volume and surface dielectric barrier discharges in N<sub>2</sub>–O<sub>2</sub> mixtures using optical emission spectroscopy. *Plasma Processes and Polymers* **2019**, e1900126.
3. Baldus, S.; Schroeder, D.; Bibinov, N.; Schulz-von der Gathen, V.; Awakowicz, P., Atomic oxygen dynamics in an air dielectric barrier discharge: a combined diagnostic and modeling approach. *Journal of Physics D: Applied Physics* **2015**, *48* (27), 275203.
